# Supplementary material for: Does afforestation deteriorate haze pollution in Beijing–Tianjin–Hebei (BTH), China?
Source: Copernicus journal article supplement (doi:10.5194/acp-18-10869-2018), 2018-08-03
Supplement: Supplementary file 1 [file acp-18-10869-2018-supplement.pdf]

Supplement of Atmos. Chem. Phys., 18, 10869–10879, 2018  
<https://doi.org/10.5194/acp-18-10869-2018-supplement>  
© Author(s) 2018. This work is distributed under  
the Creative Commons Attribution 4.0 License.

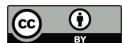

*Supplement of*

## **Does afforestation deteriorate haze pollution in Beijing–Tianjin–Hebei (BTH), China?**

**Xin Long et al.**

*Correspondence to:* Guohui Li ([ligh@ieecas.cn](mailto:ligh@ieecas.cn))

The copyright of individual parts of the supplement might differ from the CC BY 4.0 License.

19 Table S1 Land use categories in the MCD12Q1 IGBP layer and WRF-CHEM MODIS land  
 20 use.  
 21

| Land Cover Category                | Category number |         |
|------------------------------------|-----------------|---------|
|                                    | WRF-CHEM MODIS  | MOD12Q1 |
| Evergreen Needleleaf forest        | 1               | 1       |
| Evergreen Broadleaf forest         | 2               | 2       |
| Deciduous Needleleaf forest        | 3               | 3       |
| Deciduous Broadleaf forest         | 4               | 4       |
| Mixed forest                       | 5               | 5       |
| Closed shrublands                  | 6               | 6       |
| Open shrublands                    | 7               | 7       |
| Woody savannas                     | 8               | 8       |
| Savannas                           | 9               | 9       |
| Grasslands                         | 10              | 10      |
| Permanent wetlands                 | 11              | 11      |
| Croplands                          | 12              | 12      |
| Urban and built-up                 | 13              | 13      |
| Cropland/Natural vegetation mosaic | 14              | 14      |
| Snow and ice                       | 15              | 15      |
| Barren or sparsely vegetated       | 16              | 16      |
| Water                              | 17              | 0       |
| Wooded Tundra                      | 18              | ×       |
| Mixed Tundra                       | 19              | ×       |
| Barren Tundra                      | 20              | ×       |
| Unclassified                       | ×               | 254     |
| Fill Value                         | ×               | 255     |

22  
 23  
 24  
 25  
 26

27 Table S2 Threshold of the area fractional coverage of green vegetation, minimal and maximal  
 28 SFz0 used in the coupled unified Noah land-surface model.  
 29

| Category No. | Land Cover Category                   | $G_T$ | $SFz0_{min}$ | $SFz0_{max}$ |
|--------------|---------------------------------------|-------|--------------|--------------|
| 1            | Evergreen Needleleaf forest           | 0.70  | 50           | 50           |
| 2            | Evergreen Broadleaf forest            | 0.95  | 50           | 50           |
| 3            | Deciduous Needleleaf forest           | 0.70  | 50           | 50           |
| 4            | Deciduous Broadleaf forest            | 0.80  | 50           | 50           |
| 5            | Mixed forest                          | 0.80  | 20           | 50           |
| 6            | Closed shrublands                     | 0.70  | 1            | 5            |
| 7            | Open shrublands                       | 0.70  | 1            | 6            |
| 8            | Woody savannas                        | 0.70  | 1            | 5            |
| 9            | Savannas                              | 0.50  | 15           | 15           |
| 10           | Grasslands                            | 0.80  | 10           | 12           |
| 11           | Permanent wetlands                    | 0.60  | 30           | 30           |
| 12           | Croplands                             | 0.80  | 5            | 15           |
| 13           | Urban and built-up                    | 0.10  | 50           | 50           |
| 14           | Cropland/Natural vegetation<br>mosaic | 0.80  | 5            | 14           |
| 15           | Snow and ice                          | 0.00  | 0.1          | 0.1          |
| 16           | Barren or sparsely vegetated          | 0.01  | 1            | 1            |
| 17           | Water                                 | 0.00  | 0.01         | 0.01         |
| 18           | Wooded Tundra                         | 0.60  | 30           | 30           |
| 19           | Mixed Tundra                          | 0.60  | 15           | 15           |
| 20           | Barren Tundra                         | 0.30  | 5            | 10           |

30  
 31  
 32  
 33  
 34

## Supplementary Figure Captions

35  
36  
37 **Figure S1** Spatial distribution of (a) Organic carbon (OC), (b) Volatile organic compound  
38 (VOCs), (c) Nitrogen oxide, and (d) Sulfur dioxide (SO<sub>2</sub>) emission rates in  
39 December 2013.

40  
41 **Figure S2** Comparison of the simulated (a) wind direction (wdir), (b) wind speed (wspd), and  
42 (c) planetary boundary layer height (PBLH) with the reanalysis data from ECMWF  
43 at monitoring sites in BTH from 1 December 2013 to 31 January 2014. The black  
44 dots represent the observations, and the red lines denote the reanalysis data. Data  
45 are averaged over all monitoring stations in BTH.

46  
47 **Figure S3** Pattern comparisons of simulated (color counters) vs. observed (colored circles)  
48 near-surface PM<sub>2.5</sub> mass concentrations averaged during each episode. The black  
49 arrows indicate simulated surface winds.

50  
51 **Figure S4** Horizontal distribution of near-surface PM<sub>2.5</sub> mass concentration changes caused  
52 by the afforestation during each episode. The wind field changes are shown in  
53 black arrows.

54  
55 **Figure S5** Horizontal distributions of aerosol species mass concentrations and changes due to  
56 the afforestation for (a1, a2) organic aerosol (OA), (b1, b2) sulfate (SO<sub>4</sub>), (c1, c2)  
57 nitrate (NO<sub>3</sub>), (d1, d2) ammonium (NH<sub>4</sub>), and (e1, e2) elemental carbon (EC)  
58 during the episodes.

59  
60 **Figure S6** Horizontal distributions of (a) the average near surface BSOA mass concentration  
61 and (b) its change due to the afforestation during the episodes.

62  
63 **Figure S7** Horizontal distributions of (a) planetary boundary layer height (PBLH), (c) upward  
64 sensible heat flux (HFX) and (e) water vapor mixing ratio (QVAPOR), as well as  
65 (b, d, f) corresponding changes caused by the afforestation during the episodes,  
66 respectively.

67  
68 **Figure S8** Chinese vegetation regionalization. The BTH and ROI are highlighted with black  
69 lines. The data set is provided by Data Center for Resources and Environmental  
70 Sciences, Chinese Academy of Sciences (RESDC) (<http://www.resdc.cn>).

71  
72  
73  
74  
75

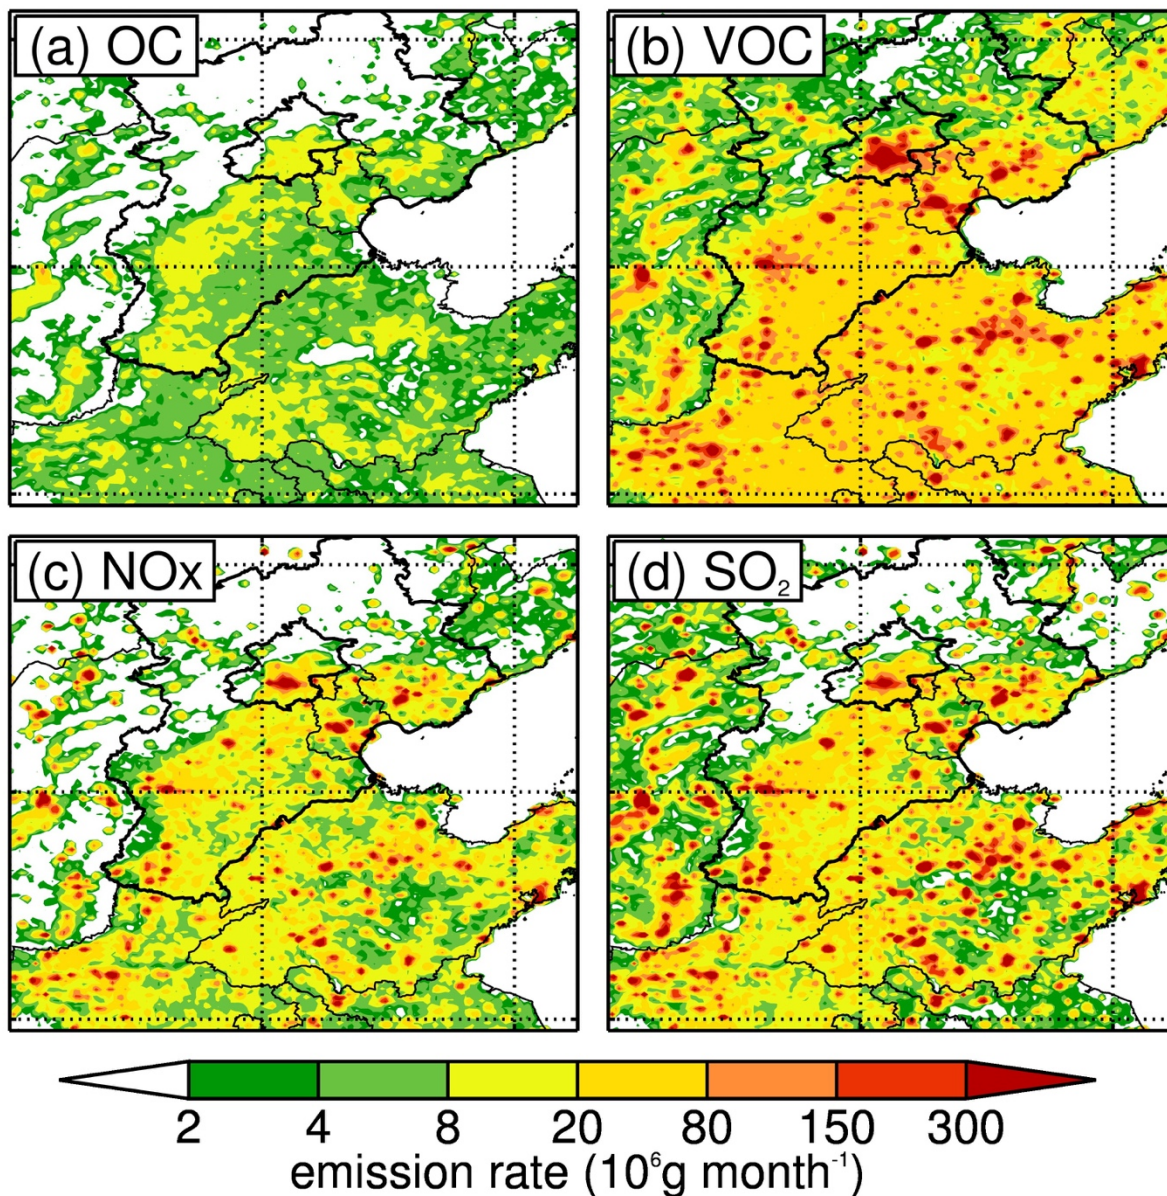

76  
 77  
 78  
 79  
 80  
 81  
 82  
 83  
 84

Figure S1 Spatial distribution of (a) Organic carbon (OC), (b) Volatile organic compound (VOCs), (c) Nitrogen oxide, and (d) Sulfur dioxide (SO<sub>2</sub>) emission rates in December 2013.

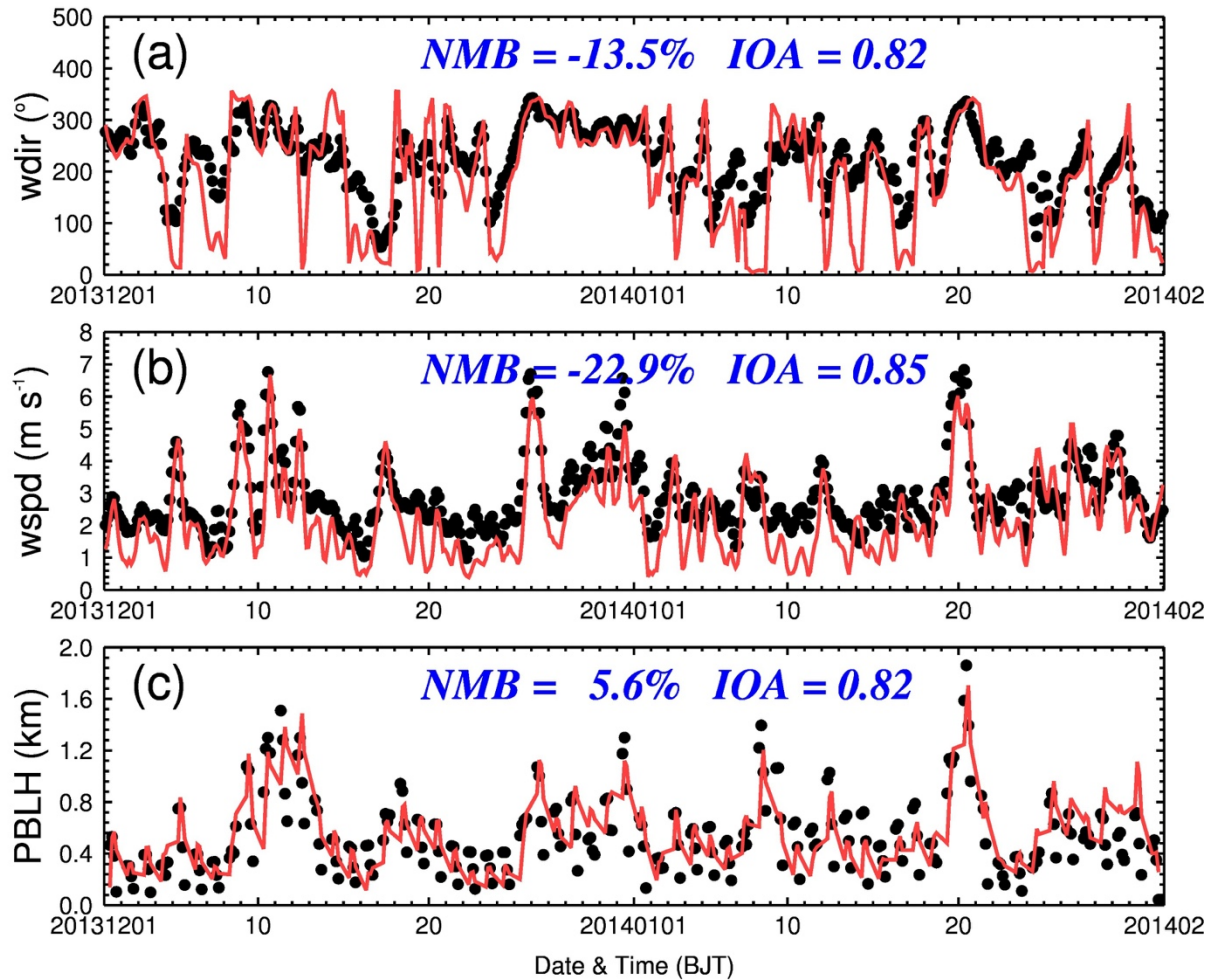

85  
 86  
 87  
 88  
 89  
 90  
 91  
 92  
 93  
 94  
 95  
 96

Figure S2 Comparison of the simulated (a) wind direction (wdir), (b) wind speed (wspd), and (c) planetary boundary layer height (PBLH) with the reanalysis data from ECMWF at monitoring sites in BTH from 1 December 2013 to 31 January 2014. The black dots represent the observations, and the red lines denote the reanalysis data. Data are averaged over all monitoring stations in BTH.

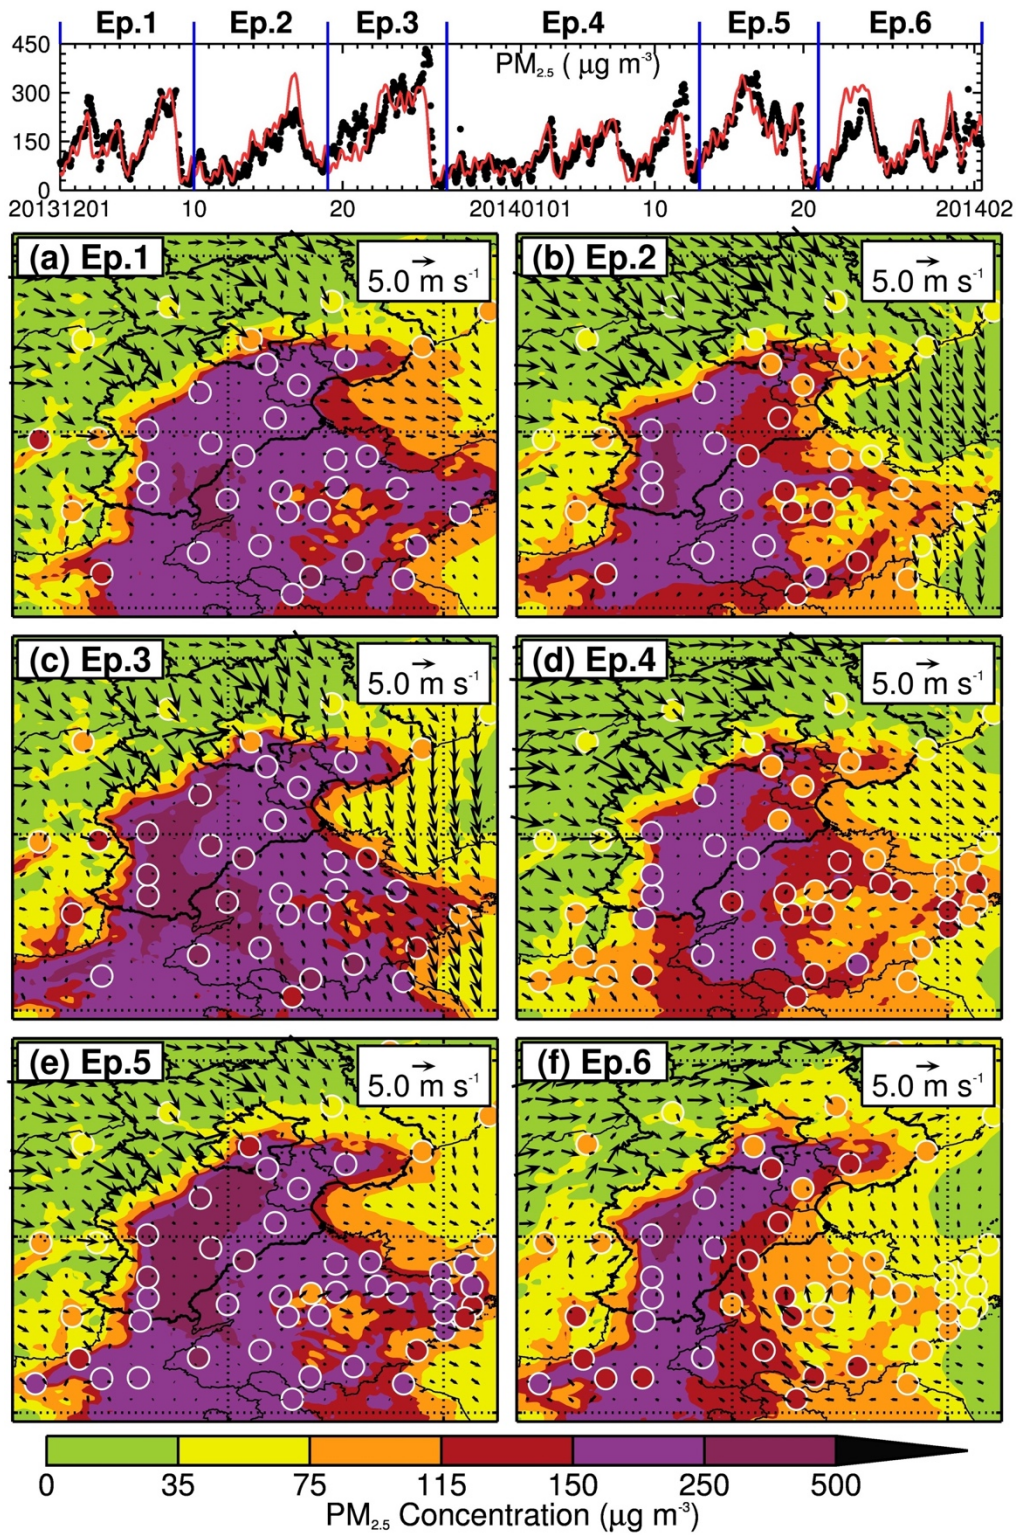

97  
 98  
 99  
 100  
 101  
 102  
 103  
 104

**Figure S3** Pattern comparisons of simulated (color counters) vs. observed (colored circles) near-surface  $PM_{2.5}$  mass concentrations averaged during each episode. The black arrows indicate simulated surface winds.

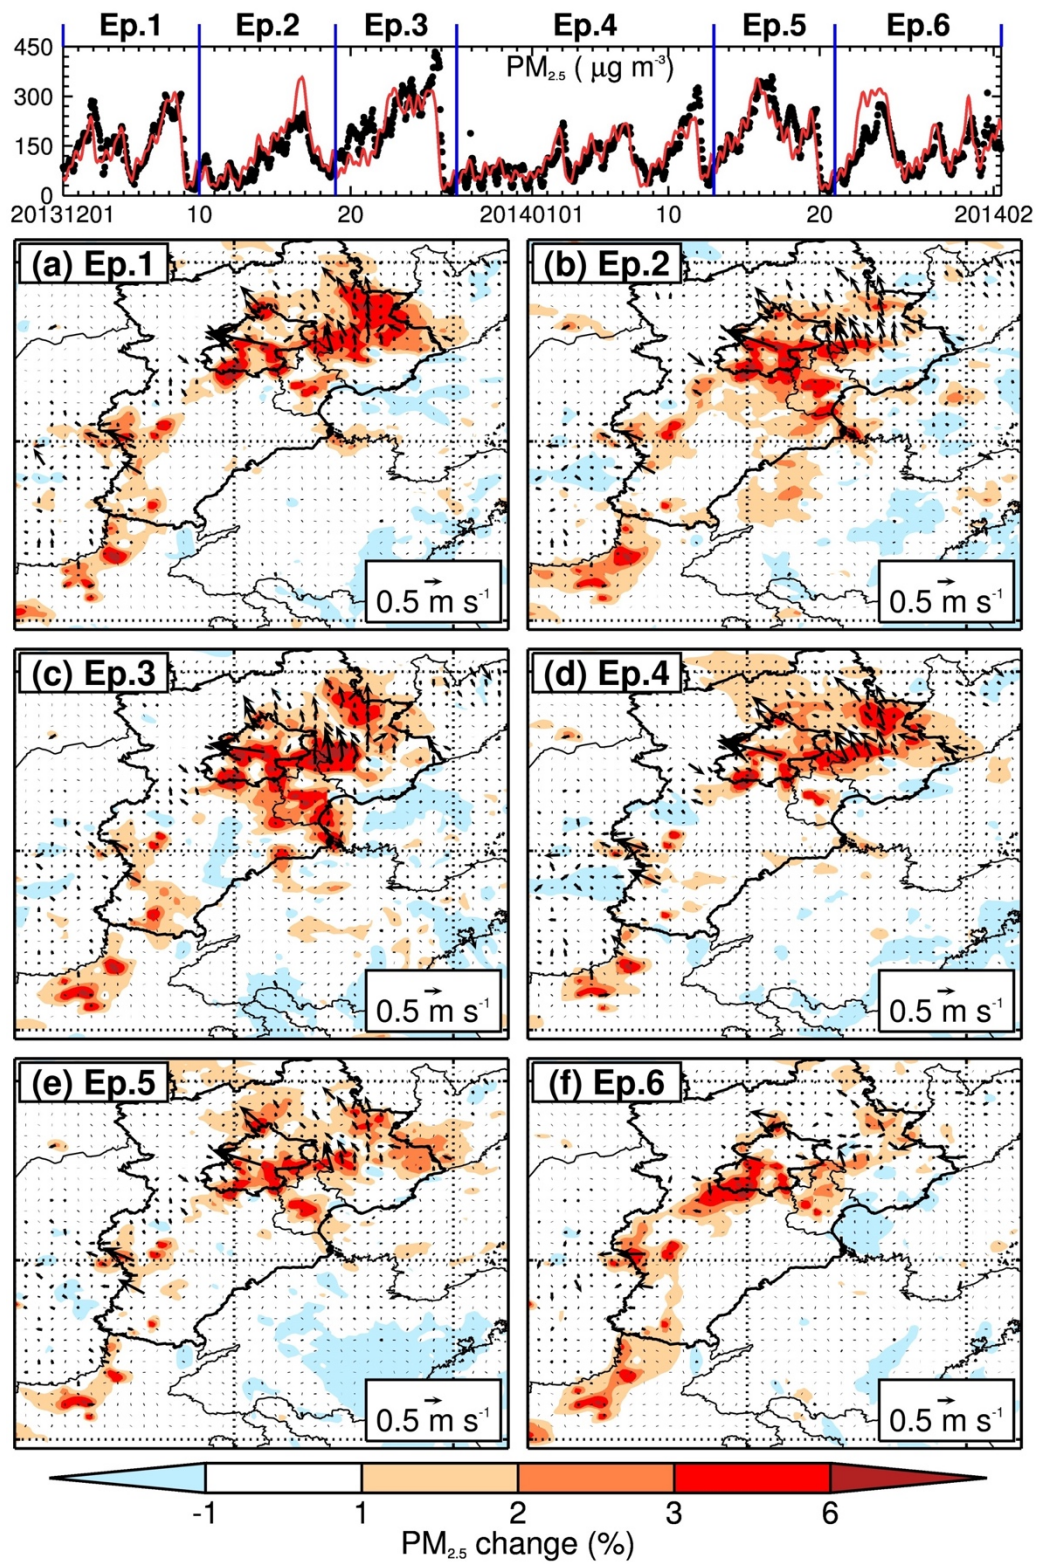

105  
 106  
 107  
 108  
 109  
 110  
 111

**Figure S4** Horizontal distribution of near-surface  $PM_{2.5}$  mass concentration changes caused by the afforestation during each episode. The wind field changes are shown in black arrows.



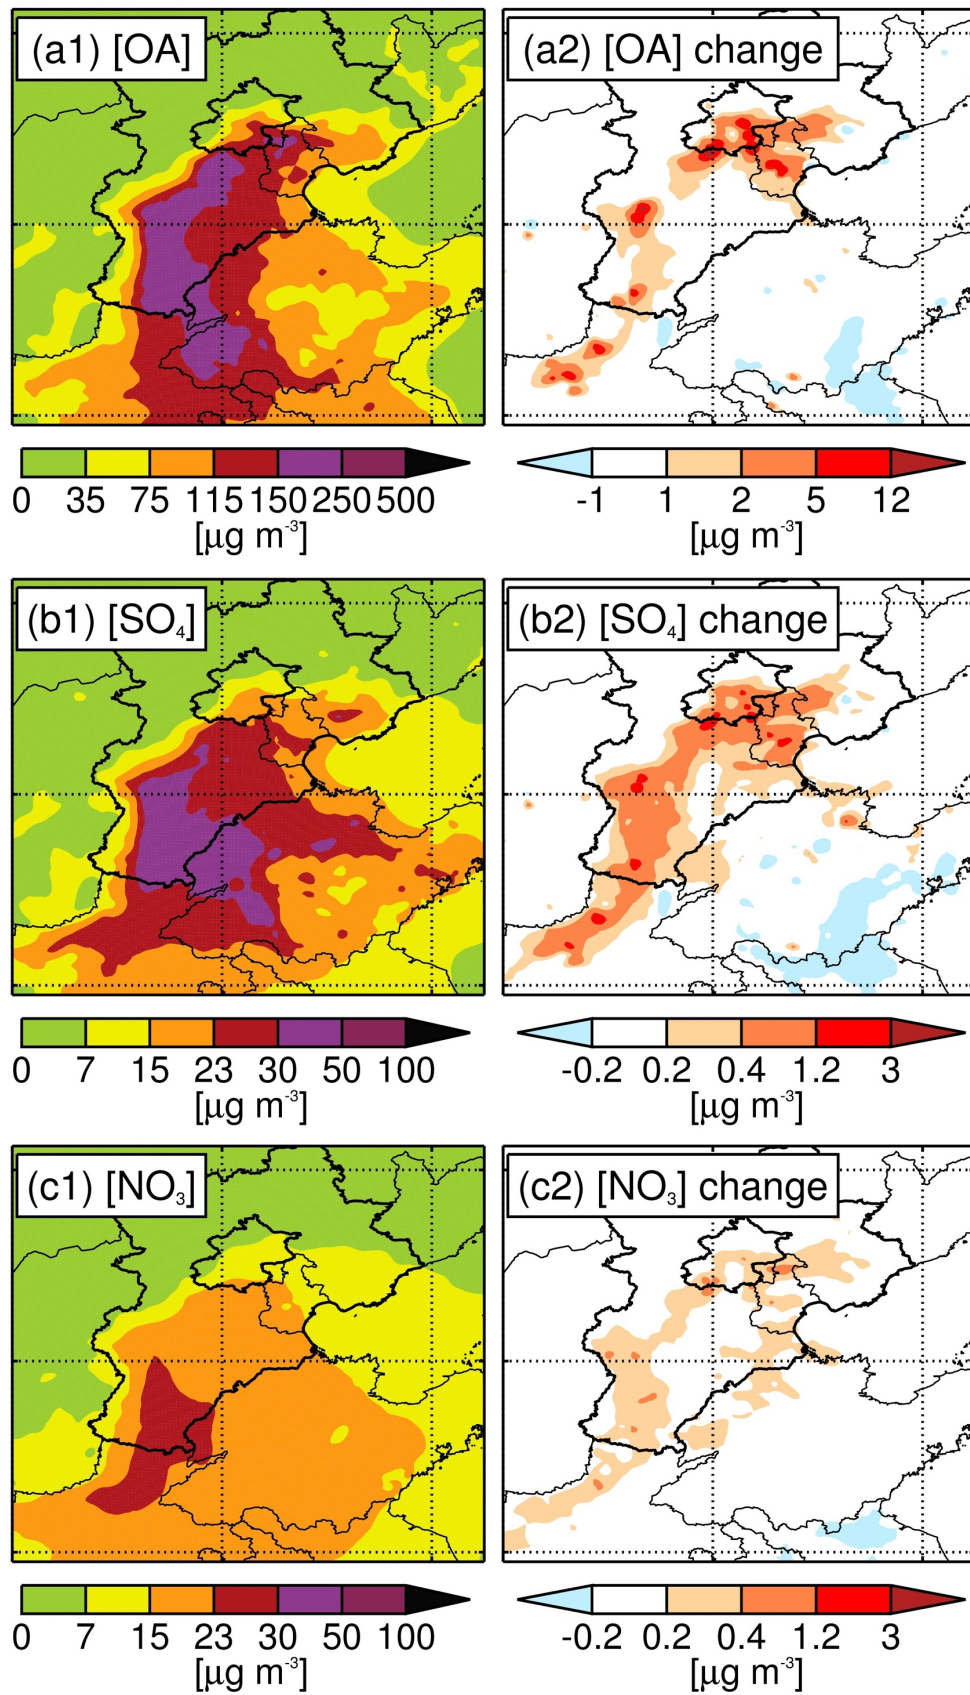

112  
 113 **Figure S5** Horizontal distributions of aerosol species mass concentrations and changes due to  
 114 the afforestation for (a1, a2) organic aerosol (OA), (b1, b2) sulfate (SO<sub>4</sub>), (c1, c2) nitrate  
 115 (NO<sub>3</sub>), (d1, d2) ammonium (NH<sub>4</sub>), and (e1, e2) elemental carbon (EC) during the episodes.  
 116

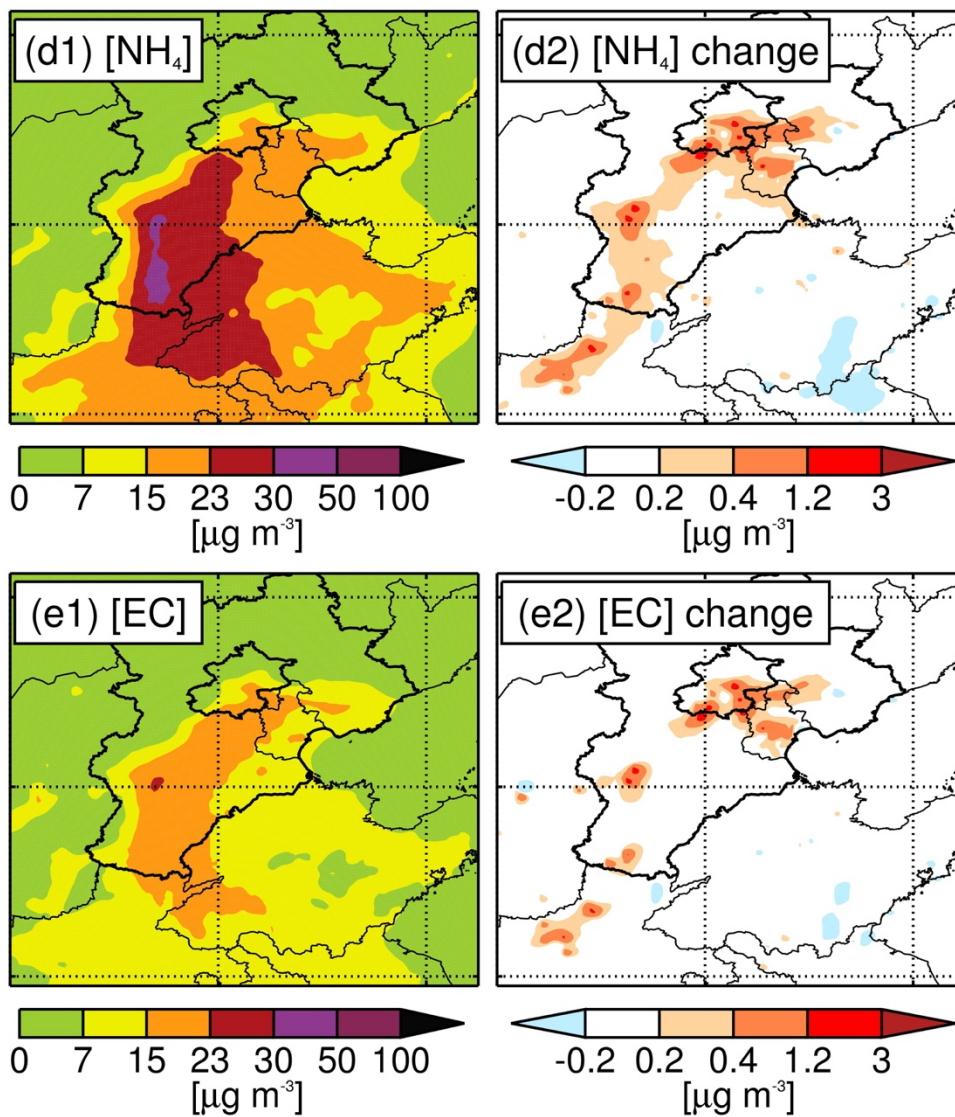

117  
 118  
 119  
 120  
 121  
 122  
 123  
 124

Figure S5 Continued

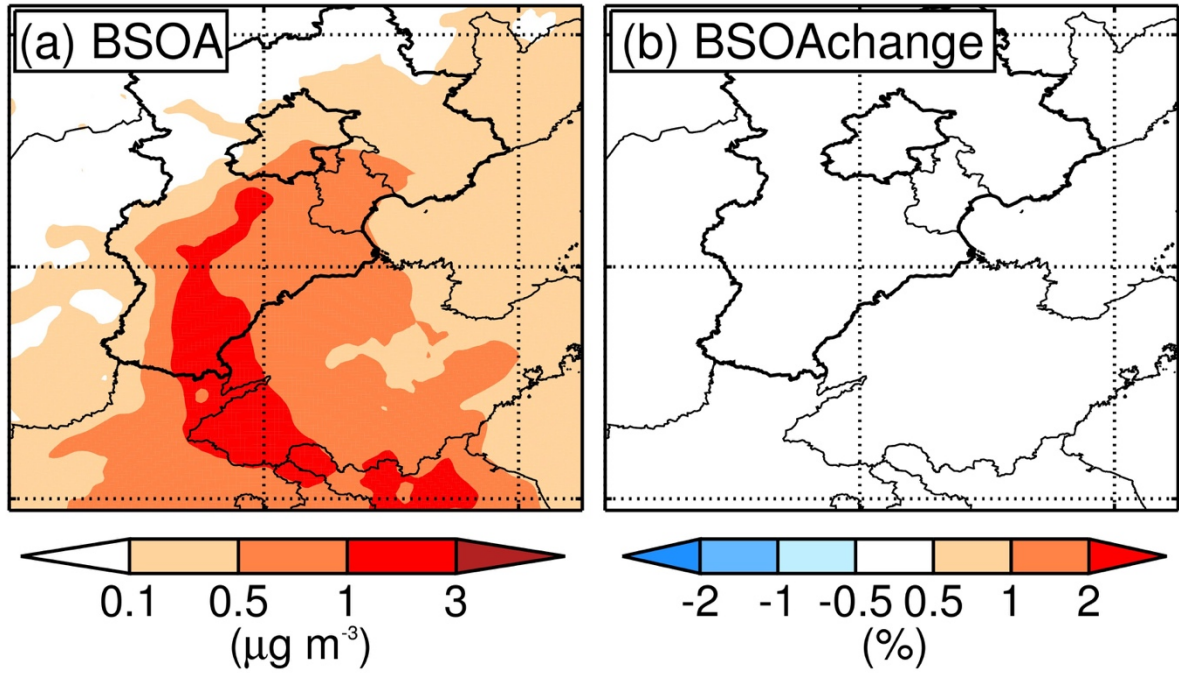

125  
 126  
 127  
 128  
 129  
 130  
 131  
 132  
 133

**Figure S6** Horizontal distributions of (a) the average near surface BSOA mass concentration and (b) its change due to the afforestation during the episodes.

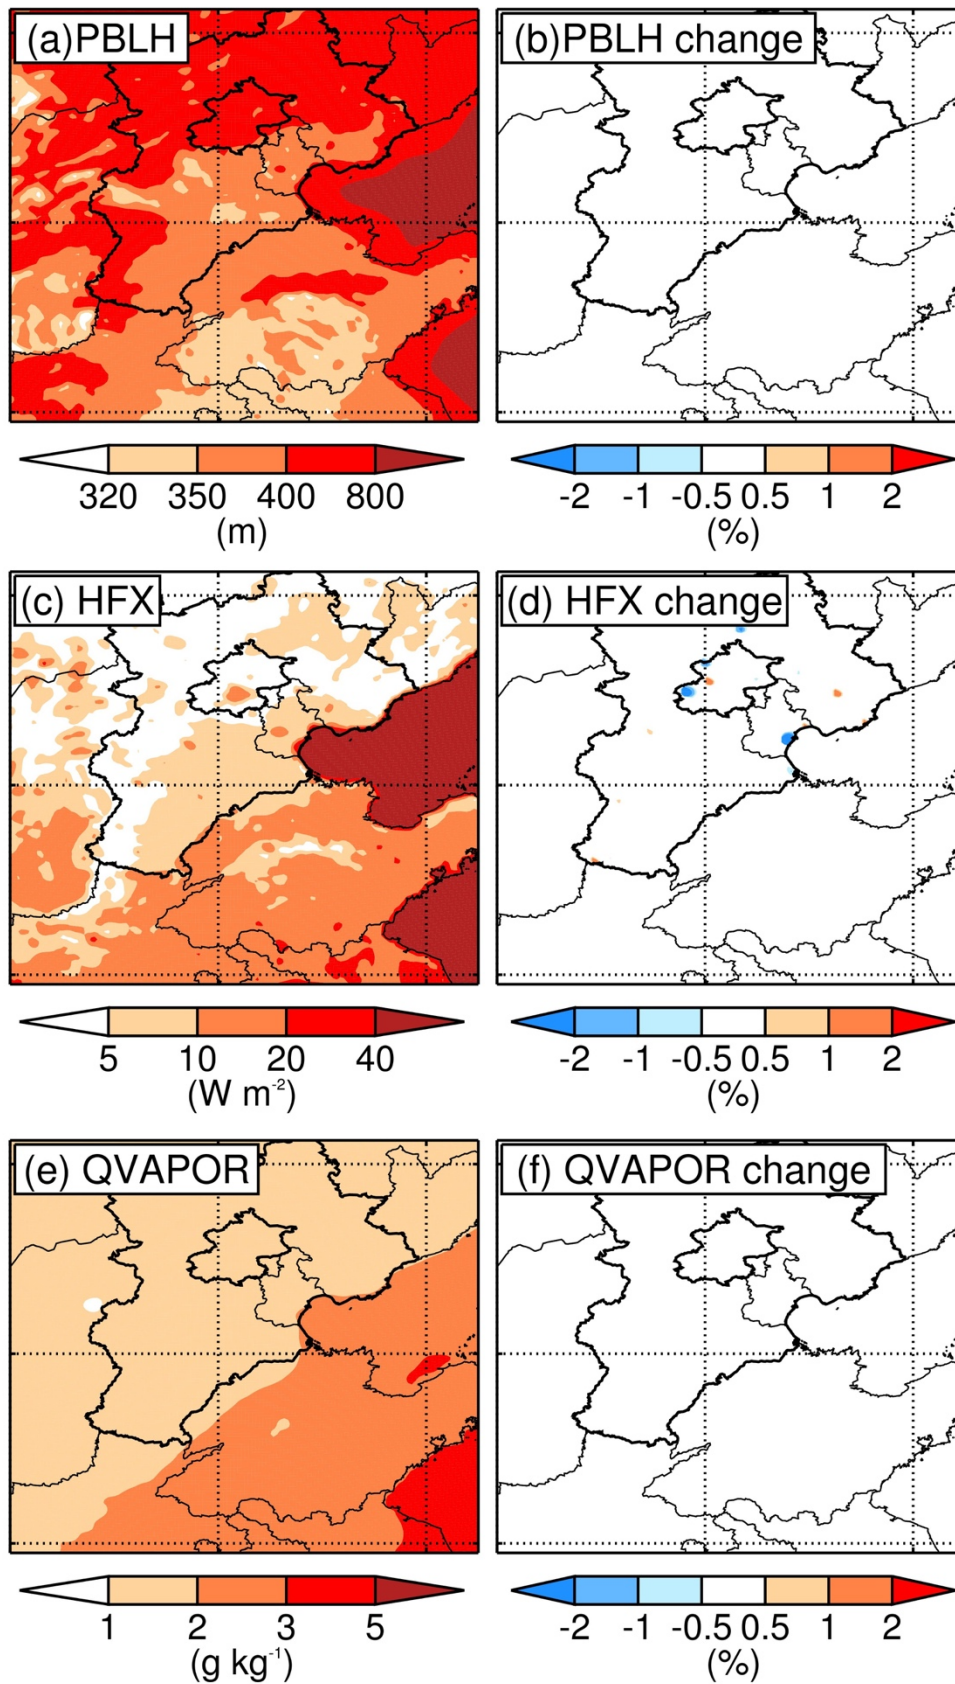

134

135 **Figure S7** Horizontal distributions of (a) planetary boundary layer height (PBLH), (c) upward  
 136 sensible heat flux (HFX) and (e) water vapor mixing ratio (QVAPOR), as well as (b, d, f)  
 137 corresponding changes caused by the afforestation during the episodes, respectively.

138 Figure S10

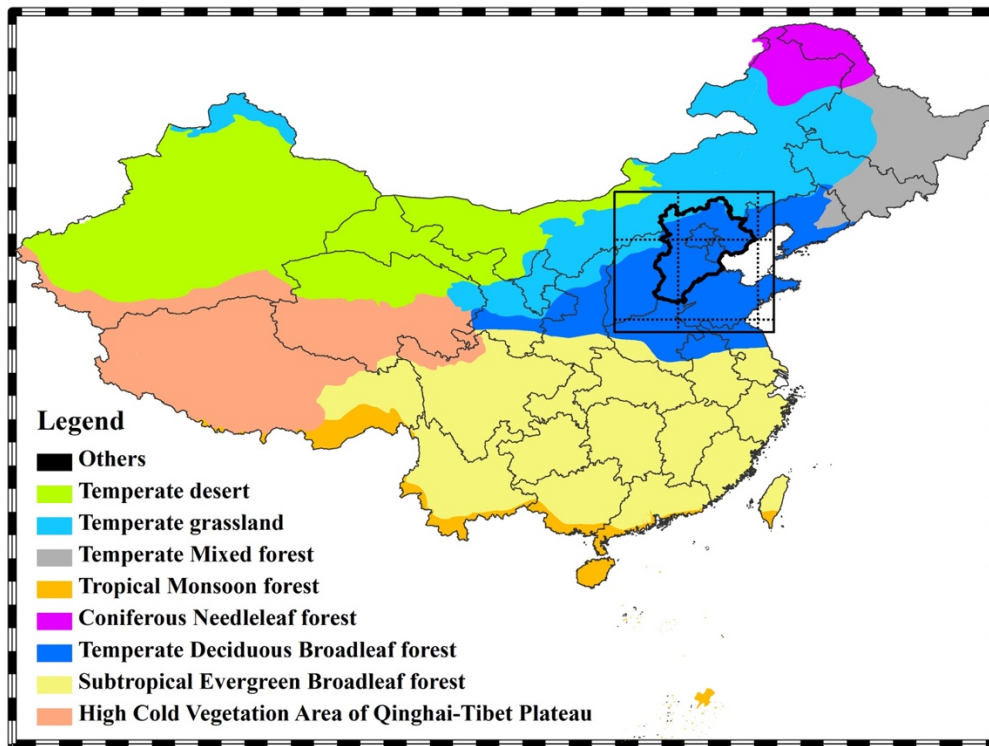

139  
 140  
 141  
 142  
 143  
 144  
 145  
 146  
 147

**Figure S8** Chinese vegetation regionalization. The BTH and ROI are highlighted with black lines. The data set is provided by Data Center for Resources and Environmental Sciences, Chinese Academy of Sciences (RESDC) (<http://www.resdc.cn>).
